# Supplementary material
Source: PubMed Central journal article supplement (PMC419451)
Supplement: nar_32_8_2386__2.pdf [file nar_32_8_2386__2.pdf]

| A. | <b>Listeria strain</b>        | <b>Serotype</b> | <b>Presence or absence of CRISPR repeats</b>          |
|----|-------------------------------|-----------------|-------------------------------------------------------|
|    | <i>L. innocua</i>             |                 | Found at locus #1                                     |
|    | <i>L. monocytogenes</i> F6854 | 1/2a            | Found at locus #1, locus #2 and locus #3 <sup>a</sup> |
|    | <i>L. monocytogenes</i> EGD-e | 1/2a            | Found at locus #3 <sup>a</sup>                        |
|    | <i>L. monocytogenes</i> F2365 | 4b              | Not found                                             |
|    | <i>L. monocytogenes</i> H7858 | 4b              | Not found <sup>b</sup>                                |

  

| B. | <b>CRISPR locus</b>   | <b>copies</b> | <b>Repeat sequence in the core of the CRISPR repeat</b> |
|----|-----------------------|---------------|---------------------------------------------------------|
|    | <i>L. innocua</i> #1  | 10            | GTTTTGTTAGCATTCAAATAACATAGCTCTAAAAC                     |
|    | <i>L. m.</i> F6854 #1 | 17            | GTTTTGGTAGCATTCAAATAACATAGCTCTAAAAC                     |
|    | <i>L. m.</i> F6854 #2 | 29            | GTTTTAACTACTTATTATGAAATGTAAAT                           |
|    | <i>L. m.</i> F6854 #3 | 4             | GTTTTAGTTACTTATTTGAAATGTAAAT                            |
|    | <i>L. m.</i> EGD-e #3 | 4             | GTTTTAGTTACTTATTGTGAAATGTAAAT                           |

a. CRISPR locus #3 consists of only a repeat sequence; no CRISPR-associated genes are present.

b. Locus #2 is a sequencing gap in strain H7858.

**Supplemental Table 1. Presence and repeat sequence comparison of CRISPR elements in 5 *Listeria* genomes.**

Abbreviations: *L.m.*, *Listeria monocytogenes*.
