# Supplementary material
Source: PubMed Central journal article supplement (PMC419451)
Supplement: nar_32_8_2386__4.pdf [file nar_32_8_2386__4.pdf]

| Strain | Serotype | Total number of ORFs | Strain-specific ORFs |       | Serotype-specific ORFs |       | ORFs with atypical composition (Chi <sup>2</sup> cutoff : 500) |       |                      |       |                        |       |
|--------|----------|----------------------|----------------------|-------|------------------------|-------|----------------------------------------------------------------|-------|----------------------|-------|------------------------|-------|
|        |          |                      | Number               | % (a) | Number                 | % (a) | Total number                                                   | % (b) | Strain-specific ORFs |       | Serotype-specific ORFs |       |
|        |          |                      |                      |       |                        |       |                                                                |       | Number               | % (c) | Number                 | % (d) |
| F2365  | 4b       | 2847                 | 51                   | 1.79  | 51                     | 1.79  | 392                                                            | 13.77 | 43                   | 84.31 | 28                     | 54.90 |
| H7858  | 4b       | 3117                 | 69                   | 2.21  | 50                     | 1.60  | 273                                                            | 8.76  | 36                   | 52.17 | 18                     | 36.00 |
| F6854  | 1/2a     | 2973                 | 97                   | 3.26  | 83                     | 2.79  | 198                                                            | 6.66  | 42                   | 43.30 | 2                      | 2.41  |
| EGD-e  | 1/2a     | 3058                 | 61                   | 1.99  | 83                     | 2.71  | 199                                                            | 6.51  | 12                   | 19.67 | 4                      | 4.82  |

(a) percentage of strain/serotype specific ORFs out of the total number of ORFs in the genome.

(b) percentage of ORFs with atypical composition out of the total number of ORFs in the genome.

(c) percentage of strain-specific ORFs with atypical composition, out of the number of strain-specific ORFs.

(d) percentage of serotype-specific ORFs with atypical composition, out of the number of serotype-specific ORFs.

**Supplemental Table 3. Genes with atypical G+C composition in *L. monocytogenes* strains F2365, H7858, F6854 and EGD-e.**

The Chi<sup>2</sup> values were calculated as previously described (windows size, 2000 bp; windows shift, 1000 bp) (12). A Chi<sup>2</sup> cutoff of 500 was chosen for identifying ORFs with atypical composition.
