# Supplementary material
Source: PubMed Central journal article supplement (PMC419451)
Supplement: nar_32_8_2386__5.pdf [file nar_32_8_2386__5.pdf]

|                       | <i>L. monocytogenes</i> 4b F2365 | <i>L. monocytogenes</i> 4b H7858 | <i>L. monocytogenes</i> 1/2a F6854 | <i>L. monocytogenes</i> 1/2a EGD-e |
|-----------------------|----------------------------------|----------------------------------|------------------------------------|------------------------------------|
| LPXTG proteins        | 44                               | 47                               | 46                                 | 42                                 |
| Signal peptide        | 420                              | 424                              | 395                                | 460                                |
| Signal peptide YSIRK  | 2                                | 2                                | 2                                  | 1                                  |
| PKD-repeat proteins   | 11                               | 10                               | 19                                 | 11                                 |
| RGD motifs            | 73                               | 80                               | 78                                 | 74                                 |
| SD-repeat proteins    | 22                               | 24                               | 25                                 | 32                                 |
| Choline binding       | 10                               | 9                                | 12                                 | 12                                 |
| Transmembrane helices | 733                              | 854                              | 786                                | 1204                               |
| Lipoprotein           | 70                               | 59                               | 67                                 | 63                                 |
| P60-like proteins     | 3                                | 2 + 1 (plasmid)                  | 3                                  | 4                                  |

| Internalins (LRR repeats) | <i>L. monocytogenes</i> 4b F2365 | <i>L. monocytogenes</i> 4b H7858 | <i>L. monocytogenes</i> 1/2a F6854 | <i>L. monocytogenes</i> 1/2a EGD-e |
|---------------------------|----------------------------------|----------------------------------|------------------------------------|------------------------------------|
| with LPXTG motifs         | 16                               | 14                               | 17                                 | 16                                 |
| secreted                  | 9                                | 15                               | 9                                  | 8                                  |
| <b>TOTAL</b>              | <b>25</b>                        | <b>29</b>                        | <b>26</b>                          | <b>24</b>                          |

**Supplemental Table 4. Proteins found with various signatures that may have a role in virulence of the species.**
