# Supplementary material
Source: PubMed Central journal article supplement (PMC419451)
Supplement: nar_32_8_2386__6.pdf [file nar_32_8_2386__6.pdf]

| <i>Listeria monocytogenes</i> 4b F2365 |                                                                         |            |
|----------------------------------------|-------------------------------------------------------------------------|------------|
| ORF #                                  | Gene name                                                               | LRR mb / s |
| LMOF2365_0281                          | internalin C2                                                           | 7 s        |
| LMOF2365_0282                          | internalin D                                                            | 8 s        |
| LMOF2365_0283                          | internalin E                                                            | 7 mb       |
| LMOF2365_0289                          | leucine rich repeat domain protein                                      | 7 s        |
| LMOF2365_0345                          | leucine rich repeat domain/ LPXTG-motif cell wall anchor domain protein | 4 mb       |
| LMOF2365_0347                          | cell wall surface anchor family protein                                 | 4 mb       |
| LMOF2365_0349                          | cell wall surface anchor family protein                                 | 7 mb       |
| LMOF2365_0350                          | cell wall surface anchor family protein                                 | 24 mb      |
| LMOF2365_0374                          | internalin                                                              | 9 mb       |
| LMOF2365_0429                          | internalin                                                              | 11 mb      |
| LMOF2365_0471                          | internalin A                                                            | 13 mb      |
| LMOF2365_0472                          | internalin B, authentic point mutation                                  | 6 s        |
| LMOF2365_0543                          | cell wall surface anchor family protein                                 | 3 mb       |
| LMOF2365_0578                          | leucine rich repeat domain protein                                      | 4 s        |
| LMOF2365_0639                          | LPXTG-motif cell wall anchor domain protein                             | 2 mb       |
| LMOF2365_0768                          | cell wall surface anchor family protein                                 | 3 mb       |
| LMOF2365_0805                          | cell wall surface anchor family protein                                 | 3 mb       |
| LMOF2365_1144                          | cell wall surface anchor family protein                                 | 8 mb       |
| LMOF2365_1254                          | cell wall surface anchor family protein                                 | 6 mb       |
| LMOF2365_1812                          | internalin family protein                                               | 4 s        |
| LMOF2365_2370                          | cell wall surface anchor family protein                                 | 3 mb       |
| LMOF2365_2416                          | leucine rich repeat domain protein                                      | 4 s        |
| LMOF2365_2418                          | leucine rich repeat domain protein                                      | 2 s        |
| LMOF2365_2443                          | leucine rich repeat domain protein                                      | 6 s        |
| LMOF2365_2812                          | cell wall surface anchor family protein                                 | 8 mb       |

| <i>Listeria monocytogenes</i> 1/2a EGD-e |                                                       |             |
|------------------------------------------|-------------------------------------------------------|-------------|
| ORF #                                    | Gene name                                             | LRR mb / s  |
| lmo0171                                  | internalin A, putative                                | 5 mb        |
| lmo0262                                  | internalin A                                          | 4 mb        |
| lmo0263                                  | internalin H                                          | 7 s         |
| lmo0264                                  | internalin A                                          | 7 mb        |
| lmo0327                                  | Leucine Rich Repeat domain protein                    | 3 mb        |
| lmo0331                                  | internalin A, putative                                | 4 mb        |
| lmo0333                                  | internalin a precursor                                | 24 mb       |
| lmo0409                                  | internalin A, putative                                | 11 mb       |
| linA                                     | internalin A                                          | 13 mb       |
| linB                                     | internalin B                                          | 6 s         |
| lmo0514                                  | LPXTG-motif cell wall anchor domain protein           | 3 mb        |
| lmo0549                                  | Leucine Rich Repeat domain protein                    | 4 s         |
| lmo0610                                  | LPXTG-motif cell wall anchor domain protein           | 2 mb        |
| lmo0732                                  | LPXTG-motif cell wall anchor domain protein, putative | 3 mb        |
| lmo0801                                  | internalin A, putative                                | 8 mb        |
| lmo1136                                  | internalin A, putative                                | 8 mb        |
| lmo1289                                  | Leucine Rich Repeat domain protein                    | 3 mb        |
| linC                                     | internalin family protein                             | 4 s         |
| lmo2396                                  | Leucine Rich Repeat domain protein                    | 5 mb        |
| lmo2445                                  | Leucine Rich Repeat domain protein                    | 3 s         |
| lmo2470                                  | orphan G protein-coupled receptor HG38, putative      | 6 s         |
| lmo2821                                  | Leucine Rich Repeat domain protein                    | 8 s         |
| <b>lmo2026</b>                           | <b>Leucine Rich Repeat domain protein</b>             | <b>4 mb</b> |
| <b>lmo2027</b>                           | <b>Leucine Rich Repeat domain protein</b>             | <b>4 s</b>  |

| <i>Listeria monocytogenes</i> 4b H7858 |                                                                         |            |
|----------------------------------------|-------------------------------------------------------------------------|------------|
| ORF #                                  | Gene name                                                               | LRR mb / s |
| LMOh7858_0291                          | Leucine Rich Repeat domain protein                                      | 4 s        |
| LMOh7858_0292                          | internalin C2                                                           | 7 s        |
| LMOh7858_0293                          | internalin D                                                            | 8 s        |
| LMOh7858_0295                          | internalin E                                                            | 7 mb       |
| LMOh7858_0301                          | leucine rich repeat domain protein                                      | 8 s        |
| LMOh7858_0365                          | leucine rich repeat domain/ LPXTG-motif cell wall anchor domain protein | 4 mb       |
| LMOh7858_0367                          | cell wall surface anchor family protein                                 | 5 mb       |
| LMOh7858_0369                          | cell wall surface anchor family protein                                 | 8 mb       |
| LMOh7858_0370                          | cell wall surface anchor family protein                                 | 25 mb      |
| LMOh7858_0394                          | internalin                                                              | 9 mb       |
| LMOh7858_0457                          | internalin                                                              | 12 mb      |
| LMOh7858_0498                          | internalin A                                                            | 13 mb      |
| LMOh7858_0499                          | internalin b precursor                                                  | 6 s        |
| LMOh7858_0574                          | cell wall surface anchor family protein                                 | 3 mb       |
| LMOh7858_0607                          | leucine rich repeat domain protein                                      | 4 s        |
| LMOh7858_0671                          | LPXTG-motif cell wall anchor domain protein                             | 4 mb       |
| LMOh7858_0798                          | cell wall surface anchor family protein                                 | 4 mb       |
| LMOh7858_0843                          | cell wall surface anchor family protein                                 | 3 mb       |
| LMOh7858_1209                          | cell wall surface anchor family protein                                 | 8 mb       |
| LMOh7858_1320                          | internalin protein (LPXTG motif) homolog lin1204                        | 8 mb       |
| LMOh7858_2546                          | cell wall surface anchor family protein                                 | 6 mb       |
| LMOh7858_2593                          | leucine rich repeat domain protein                                      | 3 s        |
| LMOh7858_2595                          | leucine rich repeat domain protein                                      | 4 s        |
| LMOh7858_2619                          | leucine rich repeat domain protein                                      | 6 s        |
| LMOh7858_3085                          | cell wall surface anchor family protein                                 | 9 mb       |

| <i>Listeria monocytogenes</i> 1/2a F6854 |                                                                         |              |
|------------------------------------------|-------------------------------------------------------------------------|--------------|
| ORF #                                    | Gene name                                                               | LRR mb / s   |
| LMOF6854_0180                            | internalin proteins, probable peptidoglycan bound protein (LPXTG motif) | 7 mb         |
| LMOF6854_0275                            | internalin C2                                                           | 8 s          |
| LMOF6854_0276                            | internalin D                                                            | 8 s          |
| LMOF6854_0277                            | internalin E                                                            | 8 mb         |
| LMOF6854_0284                            | leucine rich repeat domain protein                                      | 8 s          |
| LMOF6854_0336                            | leucine rich repeat domain/ LPXTG-motif cell wall anchor domain protein | 4 mb         |
| LMOF6854_0367                            | cell wall surface anchor family protein                                 | 26 mb        |
| LMOF6854_0469                            | internalin A precursor                                                  | 13 mb        |
| LMOF6854_0470                            | internalin A                                                            | 6 s          |
| LMOF6854_0547                            | cell wall surface anchor family protein                                 | 3 mb         |
| LMOF6854_0590                            | leucine rich repeat domain protein                                      | 4 s          |
| LMOF6854_0650                            | LPXTG-motif cell wall anchor domain protein                             | 5 mb         |
| LMOF6854_0778                            | cell wall surface anchor family protein                                 | 4 mb         |
| LMOF6854_0833                            | cell wall surface anchor family protein                                 | 3 mb         |
| LMOF6854_0846                            | internalin, peptidoglycan bound protein                                 | 8 mb         |
| LMOF6854_1175                            | cell wall surface anchor family protein                                 | 8 mb         |
| LMOF6854_1331                            | conserved hypothetical protein                                          | 3 mb         |
| LMOF6854_1332                            | internalin like protein (LPXTG motif)                                   | 2 mb         |
| LMOF6854_1845                            | internalin family protein                                               | 2 s          |
| LMOF6854_2455                            | cell wall surface anchor family protein                                 | 4 mb         |
| LMOF6854_2507                            | leucine rich repeat domain protein                                      | 4 s          |
| LMOF6854_2531                            | leucine rich repeat domain protein                                      | 6 s          |
| LMOF6854_2839                            | cell wall surface anchor family protein                                 | 9 s          |
| <b>LMOF6854_0338</b>                     | <b>Internalin A</b>                                                     | <b>5 mb</b>  |
| <b>LMOF6854_0364</b>                     | <b>internalin protein (LPXTG motif)</b>                                 | <b>12 mb</b> |
| <b>LMOF6854_0365</b>                     | <b>internalin, putative</b>                                             | <b>5 mb</b>  |

**Supplemental Table 5. Internalins in the 4 *L. monocytogenes* genomes (strains F2365, H7858, F6854 and EGD-e).**

Internalins were identified by searching for leucine-rich repeats (LRR). LRR motifs were identified using hidden Markov model (HMM) PF00560. The number of copies of LRR motifs that could be for each protein is indicated in the third column. Internalins are categorized as membrane proteins (MB) or secreted (S) depending on the presence of an LPXTG motif (detected by HMM TIGR01167) or a signal peptide (a Y-score lower limit of 0.3 was used as the cutoff). Strain-specific internalins are highlighted in yellow. Gene names for *L. monocytogenes* strains H7858, F6854 and EGD-e represent functional names assigned during the auto-annotation process.
